# Supplementary material
Source: Springer Nature journal article supplement (https://www.springermedizin.de/resource/supplementary/13020_2010_124_MOESM1_ESM.pdf/9641032)

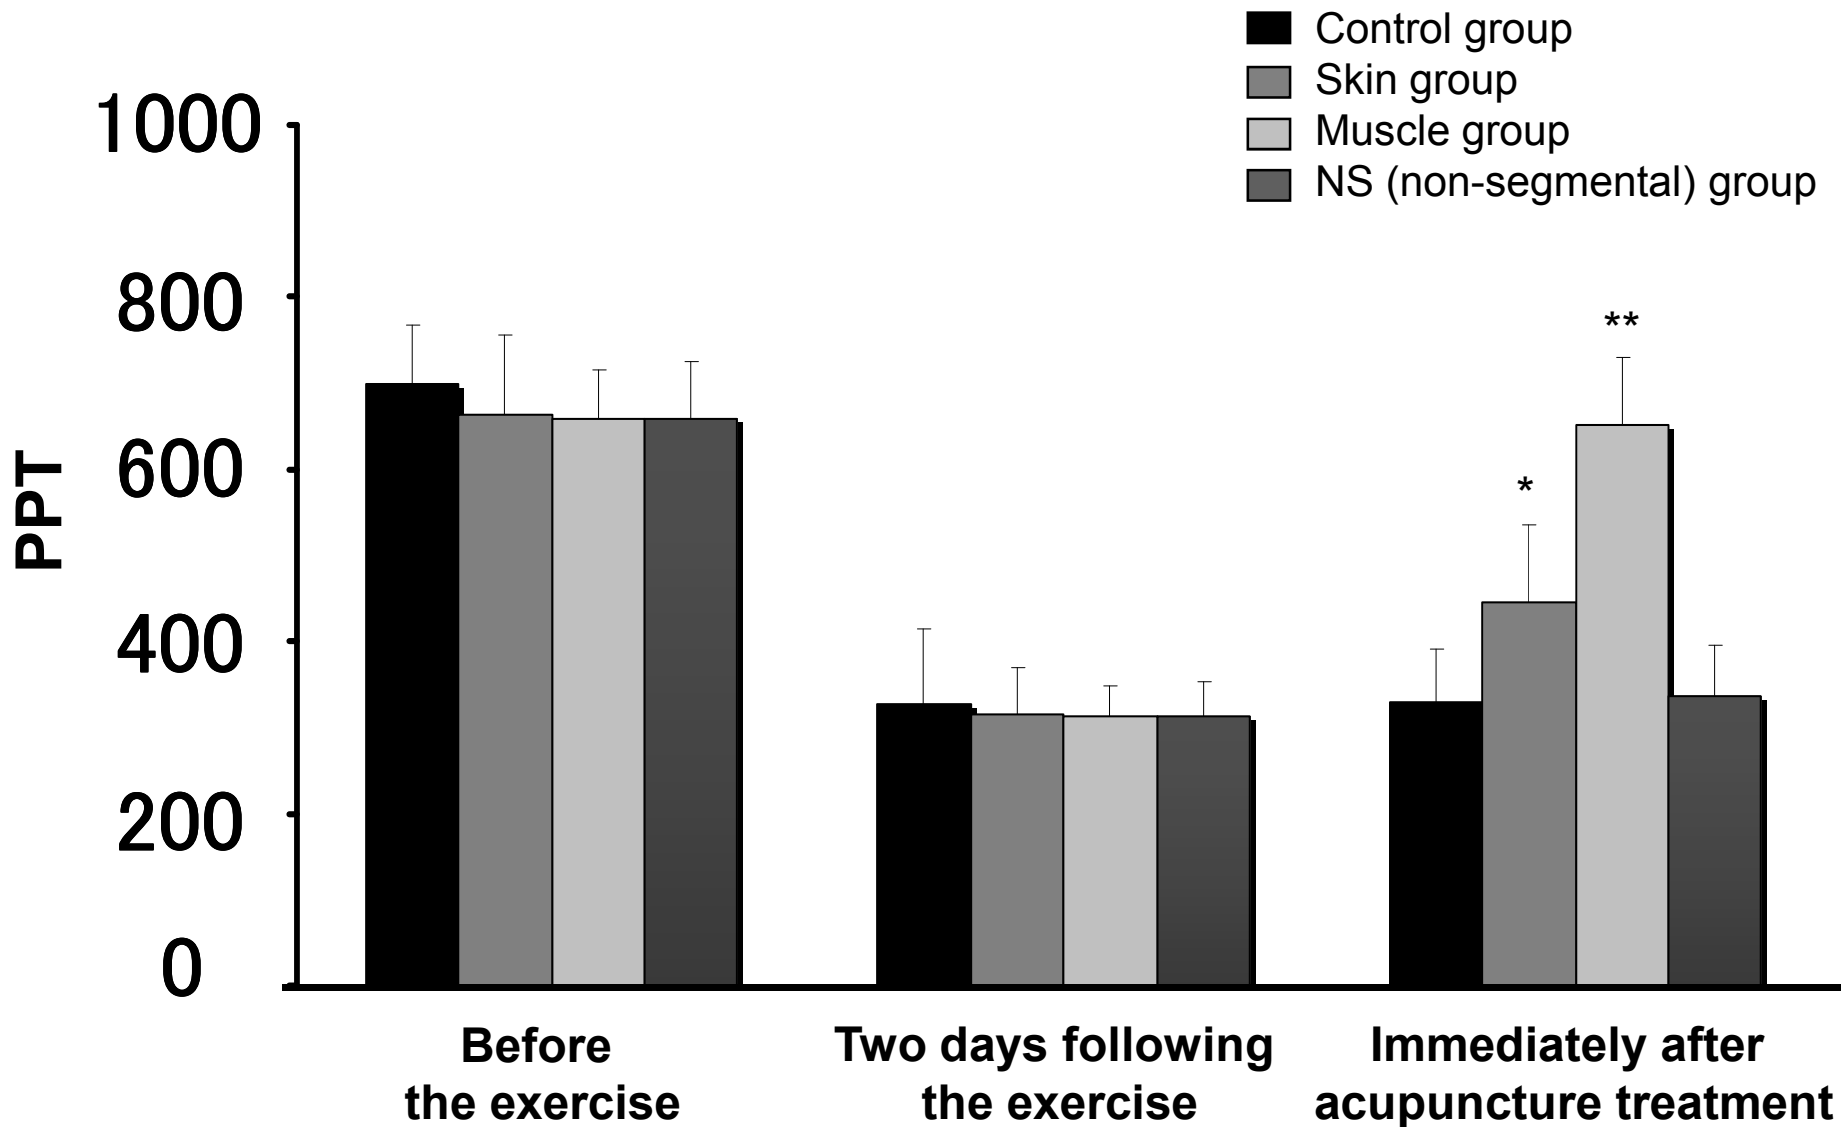

Supplement: MOESM1 [file 9641032]
